# Supplementary material for: Genetic variation in the SIM1 locus is associated with erectile dysfunction
Source: PubMed Central journal article supplement — Proc Natl Acad Sci U S A. 2018 Oct 8;115(43):11018–23. doi: 10.1073/pnas.1809872115 (PMC6205494; doi:10.1073/pnas.1809872115), 2018-10-08

## Supporting Information

This appendix has been provided by the authors to give readers additional information about their work. Supplement to: Eric Jorgenson, Navneet Matharu, Melody R. Palmer, Jie Yin, Jun Shan, Thomas J. Hoffmann, Khanh K. Thai, Xujia Zhou, James M. Hotaling, Gail Jarvik, Nadav Ahituv, Hunter Wessells, and Stephen K. Van Den Eeden. Genetic Variation in the SIM1 locus is associated with erectile dysfunction.

## **Contents**

### **Tables**

|                                                                                                                        |          |
|------------------------------------------------------------------------------------------------------------------------|----------|
| <b>Supplementary Table 1: 95% Credible Set of SNPs in the Chromosome 6 Erectile Dysfunction Risk Region</b>            | <b>3</b> |
| <b>Supplementary Table 2: U.K. Biobank Subject Characteristics</b>                                                     | <b>4</b> |
| <b>Supplementary Table 3: GERA and UKB Meta-Analysis Results for the 95% Credible Set SNPs</b>                         | <b>5</b> |
| <b>Supplementary Table 4. Characteristics of GERA Men by Response to the Health Survey</b>                             | <b>6</b> |
| <b>Supplementary Table 5: Primer Sequences for Enhancer Assays</b>                                                     | <b>7</b> |
| <b>Supplementary Table 6: Imputation <math>r^2</math> of SNPs in the Chromosome 6 Erectile Dysfunction Risk Region</b> | <b>8</b> |

### **Figure**

|                                                                                             |             |
|---------------------------------------------------------------------------------------------|-------------|
| <b>Supplementary Figure 1. Forest plot of the subgroup and sensitivity analyses in GERA</b> | <b>9-10</b> |
|---------------------------------------------------------------------------------------------|-------------|

**Supplementary Table 1: 95% Credible Set of SNPs in the Chromosome 6 Erectile Dysfunction Risk Region**

| <b>Chromosome</b> | <b>Position</b> | <b>SNP</b> | <b>Posterior Inclusion Probability</b> | <b>Cumulative Inclusion Probability</b> |
|-------------------|-----------------|------------|----------------------------------------|-----------------------------------------|
| 6                 | 100,610,044     | rs78677597 | 0.298                                  | 0.298                                   |
| 6                 | 100,600,097     | rs17789218 | 0.296                                  | 0.595                                   |
| 6                 | 100,620,931     | rs17185536 | 0.151                                  | 0.745                                   |
| 6                 | 100,602,753     | rs9496567  | 0.137                                  | 0.882                                   |
| 6                 | 100,613,551     | rs9496614  | 0.112                                  | 0.995                                   |

**Supplementary Table 2: U.K. Biobank Subject Characteristics**

| <b>Case/Control Status</b>    | <b>Race/Ethnicity</b> | <b>no. (%)</b> | <b>Age — yrs</b> | <b>Body Mass Index</b> |
|-------------------------------|-----------------------|----------------|------------------|------------------------|
| <b>Cases (n = 2,959)</b>      |                       |                |                  |                        |
|                               | European/White        | 2,783 (94.1)   | 61.2 ± 6.3       | 29.1 ± 4.6             |
|                               | South Asian           | 70 (2.4)       | 59.3 ± 7.3       | 28.5 ± 5.0             |
|                               | Mixed/other           | 36 (1.6)       | 58.2 ± 7.8       | 28.6 ± 4.4             |
|                               | African British       | 68 (1.6)       | 58.8 ± 7.5       | 28.9 ± 3.9             |
|                               | East Asian            | 2 (0.3)        | 61.0 ± 1.4       | 27.0 ± 5.1             |
| <b>Controls (n = 220,079)</b> |                       |                |                  |                        |
|                               | European/White        | 206,975 (94.0) | 57.4 ± 8.1       | 27.8 ± 4.2             |
|                               | South Asian           | 5,234 (2.4)    | 53.8 ± 8.7       | 27.0 ± 3.9             |
|                               | Mixed/other           | 3,626 (1.2)    | 54.3 ± 8.6       | 27.9 ± 4.3             |
|                               | African British       | 3,566 (2.3)    | 52.0 ± 8.2       | 28.3 ± 4.3             |
|                               | East Asian            | 678 (0.1)      | 52.3 ± 8.1       | 25.5 ± 3.2             |

Age and Body Mass Index are presented as means ± standard deviation.

**Supplementary Table 3: GERA and UKB Meta-Analysis Results for the 95% Credible Set SNPs**

| Chromosome | Position    | SNP        | Risk Allele | GERA |                        | UKB  |                        | Combined |                        |
|------------|-------------|------------|-------------|------|------------------------|------|------------------------|----------|------------------------|
|            |             |            |             | OR   | p                      | OR   | p                      | OR       | p                      |
| 6          | 100,600,097 | rs17789218 | C           | 1.26 | 1.40*10 <sup>-25</sup> | 1.15 | 5.64*10 <sup>-13</sup> | 1.25     | 7.02*10 <sup>-37</sup> |
| 6          | 100,602,753 | rs9496567  | A           | 1.26 | 1.60*10 <sup>-25</sup> | 1.14 | 1.73*10 <sup>-13</sup> | 1.25     | 2.31*10 <sup>-37</sup> |
| 6          | 100,610,044 | rs78677597 | C           | 1.27 | 1.23*10 <sup>-25</sup> | 1.16 | 4.21*10 <sup>-13</sup> | 1.25     | 4.61*10 <sup>-37</sup> |
| 6          | 100,613,551 | rs9496614  | C           | 1.26 | 1.81*10 <sup>-25</sup> | 1.14 | 3.83*10 <sup>-13</sup> | 1.25     | 6.00*10 <sup>-37</sup> |
| 6          | 100,620,931 | rs17185536 | T           | 1.26 | 3.36*10 <sup>-25</sup> | 1.20 | 6.78*10 <sup>-14</sup> | 1.25     | 1.84*10 <sup>-37</sup> |

**Supplementary Table 4. Characteristics of GERA Men by Response to the Health Survey**

| <b>Characteristic</b>        | <b>Always<br/>(n = 13,753)</b> | <b>Usually<br/>(n = 8,681)</b> | <b>Sometimes<br/>(n = 7,136)</b> | <b>Never<br/>(n = 7,079)</b> | <b>Total<br/>(n = 36,649)</b> |               |
|------------------------------|--------------------------------|--------------------------------|----------------------------------|------------------------------|-------------------------------|---------------|
| Race/Ethnicity — no. (%)     | Non-Hispanic white             | 11,090 (80.6)                  | 6,905 (79.5)                     | 5,704 (79.9)                 | 6,160 (87.0)                  | 29,859 (81.5) |
|                              | Hispanic/Latino                | 1,214 (8.8)                    | 740 (8.5)                        | 579 (8.1)                    | 437 (6.2)                     | 2,970 (8.1)   |
|                              | East Asian                     | 1,061 (7.7)                    | 738 (8.5)                        | 579 (8.1)                    | 359 (5.1)                     | 2,737 (7.5)   |
|                              | African American               | 388 (2.8)                      | 298 (3.4)                        | 274 (3.8)                    | 123 (1.7)                     | 1,083 (3.0)   |
| Age — yrs                    | 54.1 ± 11.4                    | 59.3 ± 10.7                    | 64.9 ± 10.2                      | 72.9 ± 9.8                   | 61.1 ± 12.8                   |               |
| Body Mass Index              | 26.7 ± 4.2                     | 27.2 ± 4.5                     | 27.6 ± 4.7                       | 27.7 ± 4.8                   | 27.2 ± 4.5                    |               |
| Diabetes — no. (%)           | Yes                            | 1,669 (12.1)                   | 1,596 (18.4)                     | 1,835 (25.7)                 | 2,405 (34.0)                  | 7,505 (20.5)  |
|                              | No                             | 12,084 (87.9)                  | 7,085 (81.6)                     | 5,301 (74.3)                 | 4,674 (66.0)                  | 29,144 (79.5) |
| Smoking History — no. (%)    | Never                          | 8,245 (61.1)                   | 4,341 (51.1)                     | 3,009 (43.6)                 | 2,536 (37.7)                  | 18,131 (50.9) |
|                              | Former                         | 4,543 (33.7)                   | 3,638 (42.8)                     | 3,382 (49.1)                 | 3,853 (57.3)                  | 15,416 (43.3) |
|                              | Current                        | 704 (5.2)                      | 516 (6.1)                        | 503 (7.3)                    | 338 (5.0)                     | 2,061 (5.8)   |
| EHR Diagnosis — no. (%)      | Yes                            | 2,325 (16.9)                   | 2,912 (33.5)                     | 3,059 (42.9)                 | 2,532 (35.8)                  | 10,828 (29.5) |
|                              | No                             | 11,428 (83.1)                  | 5,769 (66.5)                     | 4,077 (57.1)                 | 4,547 (64.2)                  | 25,821 (70.5) |
| PDE5i Prescription — no. (%) | Yes                            | 2,595 (18.9)                   | 3,918 (45.1)                     | 4,654 (65.2)                 | 3,768 (53.2)                  | 14,935 (40.8) |
|                              | No                             | 11,158 (81.1)                  | 4,763 (54.9)                     | 2,482 (34.8)                 | 3,311 (46.8)                  | 21,714 (59.2) |

Age and Body Mass Index are presented as means ± standard deviation; Abbreviations: EHR, electronic health record; PDE5i, phosphodiesterase type 5 inhibitor. Some participants did not have smoking history (n = 1,041).

**Supplementary Table 5: Primer Sequences for Enhancer Assays**

| <b>SNP</b>     | <b>Forward Primer Sequence</b> | <b>Reverse Primer Sequence</b> | <b>Coordinates (hg19)</b>                | <b>Length (bp)</b> |
|----------------|--------------------------------|--------------------------------|------------------------------------------|--------------------|
| rs17789218 T>C | GGACAGGAGGAAAACCTG             | ATAGCCATATTCATGAAGGTCC         | <a href="#">chr6:100598913+100600880</a> | 1968bp             |
| rs9496567 G>A  | GTGCAAAACCTCTCCCATAGG          | GGAGTGTGTCCAAAGGCTATC          | <a href="#">chr6:100601759+100602947</a> | 1189bp             |
| rs78677597 A>C | GGAAGCAAGCAAAGATGTCAAC         | GGCATATAGCAAATCATGCAGC         | <a href="#">chr6:100608132+100610164</a> | 2033bp             |
| rs9496614 G>A  | CTCCTGCTCTCTGAGTACAATCC        | TCACGACAGCCATGATCAC            | <a href="#">chr6:100613365+100615275</a> | 1911bp             |
| rs17185536 C>T | GGGAAATGTTGAGCTAACTGG          | TTCAAAGCATAATGTGAAGGG          | <a href="#">chr6:100619173+100621103</a> | 1931bp             |
| rs57989773 T>C | ATGTTCCAGCACCCACAGCTT          | TGAAGTCCTACAACCAGAAGGAC        | <a href="#">chr6:100628727+100630559</a> | 1833bp             |

**Supplementary Table 6: Imputation  $r^2$  of SNPs in the Chromosome 6 Erectile Dysfunction Risk Region**

| Chromosome | Position    | SNP        | GERA               |            |                  |                  | UKB   |             |       |                 |
|------------|-------------|------------|--------------------|------------|------------------|------------------|-------|-------------|-------|-----------------|
|            |             |            | Non-Hispanic white | East Asian | African American | Hispanic /Latino | White | South Asian | Mixed | African British |
| 6          | 100,600,097 | rs17789218 | 1.00               | 1.00       | 0.87             | 0.93             | 1.00  | 1.00        | 1.00  | 1.00            |
| 6          | 100,602,753 | rs9496567  | 0.99               | 0.97       | 1.00             | 1.00             | 0.99  | 0.99        | 0.99  | 0.99            |
| 6          | 100,610,044 | rs78677597 | 0.99               | 0.99       | 0.88             | 0.94             | 1.00  | 1.00        | 1.00  | 1.00            |
| 6          | 100,613,551 | rs9496614  | 0.99               | 0.98       | 0.99             | 0.99             | 0.99  | 0.99        | 0.99  | 0.99            |
| 6          | 100,620,931 | rs17185536 | 0.97               | 0.91       | 0.94             | 0.97             | 0.99  | 0.99        | 0.99  | 0.99            |



### Supplementary Figure 1. Forest plot of the subgroup and sensitivity analyses in GERA

Odds ratios (OR) and 95% confidence interval lower (LCL) and upper (UCL) bounds for association analyses between the SNP rs17185536 and the risk of erectile dysfunction. A. Results stratified by decade of age and by GERA cohort race/ethnicity group. B. Results adjusting for known erectile dysfunction risk factors. C. Results by health survey response level, clinical definition, treatment definition, and combined survey, clinical, and treatment definition.

#### A. Results by Decade of Age and GERA Race/Ethnicity Group

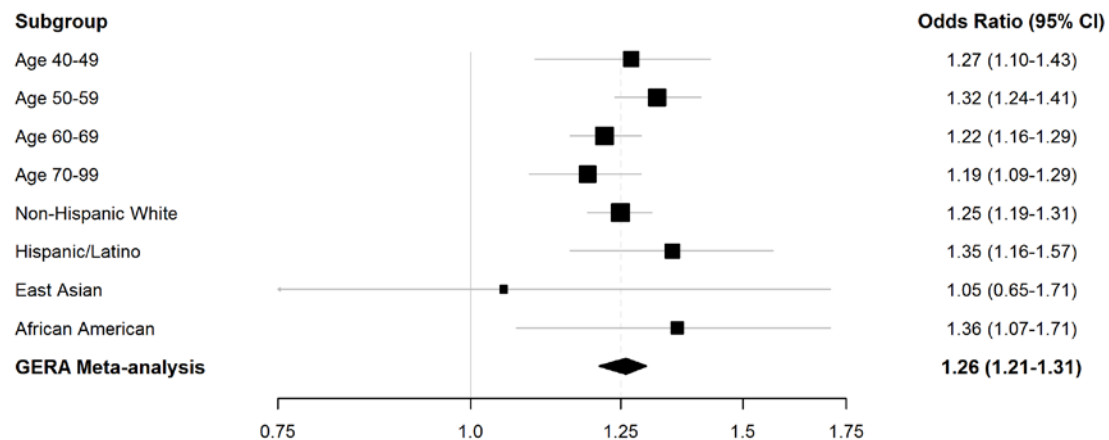

## B. Sensitivity Analyses by Erectile Dysfunction Risk Factor

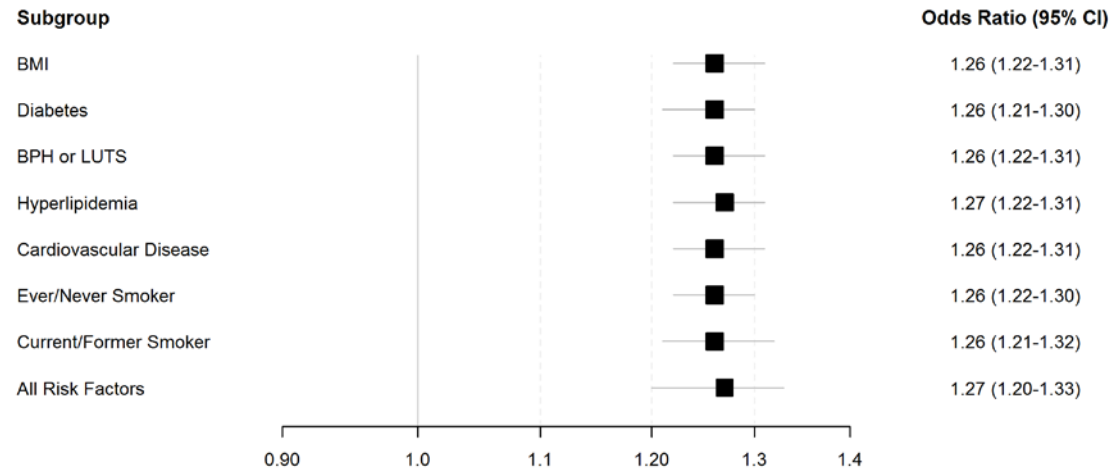

## C. Sensitivity Analyses by Diagnostic Subgroup

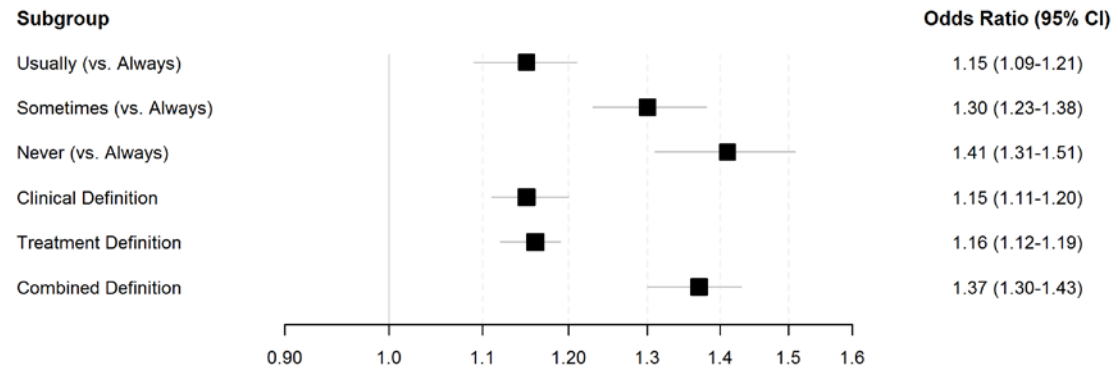

Supplement: pnas.1809872115.sapp.pdf [file pnas.1809872115.sapp.pdf]
